# Supplementary material for: Simultaneous fingerprint and high-wavenumber fiber-optic Raman spectroscopy improves in vivo diagnosis of esophageal squamous cell carcinoma at endoscopy
Source: PubMed Central journal article supplement (PMC4525386; doi:10.1038/srep12957), 2015-08-05

**Simultaneous fingerprint and high-wavenumber fiber-optic Raman spectroscopy improves *in vivo* diagnosis of esophageal squamous cell carcinoma at endoscopy**

Jianfeng Wang<sup>1</sup>, Kan Lin<sup>1</sup>, Wei Zheng<sup>1</sup>, Khek Yu Ho<sup>2</sup>, Ming Teh<sup>3</sup>,  
Khay Guan Yeoh<sup>2</sup> & Zhiwei Huang<sup>1\*</sup>

<sup>1</sup>Optical Bioimaging Laboratory, Department of Biomedical Engineering, Faculty of Engineering, National University of Singapore, Singapore 117576

<sup>2</sup>Department of Medicine, Yong Loo Lin School of Medicine, National University of Singapore and National University Health System, Singapore 119260

<sup>3</sup>Department of Pathology, Yong Loo Lin School of Medicine, National University of Singapore and National University Health System, Singapore 119074

**Subject Areas:** Translational Research; Raman spectroscopy

\*Correspondence and requests for materials should be addressed to Z.H.  
(biehzw@nus.edu.sg)

**Supplementary Fig. S1** | Representative Raman spectrum of ESCC for diagnostic model development. The S/N ratio of Raman spectra is  $>10$  by using the in vivo fiber-optic Raman technique developed. Prominent esophageal tissue Raman peaks with tentative assignments can be observed in the FP region, i.e., 853 ( $\nu(\text{C-C})$  proteins), 1004 ( $\nu_s(\text{C-C})$  ring breathing of phenylalanine), 1078 ( $\nu(\text{C-C})$  of lipids), 1265 (amide III  $\nu(\text{C-N})$  and  $\delta(\text{N-H})$  of proteins), 1302 ( $\text{CH}_2$  twisting and wagging of lipids), 1335 ( $\text{CH}_3\text{CH}_2$  twisting of proteins and nucleic acids), 1445 ( $\delta(\text{CH}_2)$  deformation of proteins and lipids), 1618 ( $\nu(\text{C=C})$  of porphyrins), 1655 (amide I  $\nu(\text{C=O})$  of proteins), and 1745  $\text{cm}^{-1}$  ( $\nu(\text{C=O})$  of phospholipids). Intense Raman peaks are also observed in the HW region i.e., 2850 and 2885  $\text{cm}^{-1}$  (symmetric and asymmetric  $\text{CH}_2$  stretching of lipids), 2940  $\text{cm}^{-1}$  ( $\text{CH}_3$  stretching of proteins),  $\sim 3300$   $\text{cm}^{-1}$  (amide A ( $\text{NH}$  stretching of proteins)) and the broad Raman band of water ( $\text{OH}$  stretching vibrations peaking at  $\sim 3250$  and  $\sim 3400$   $\text{cm}^{-1}$ ).

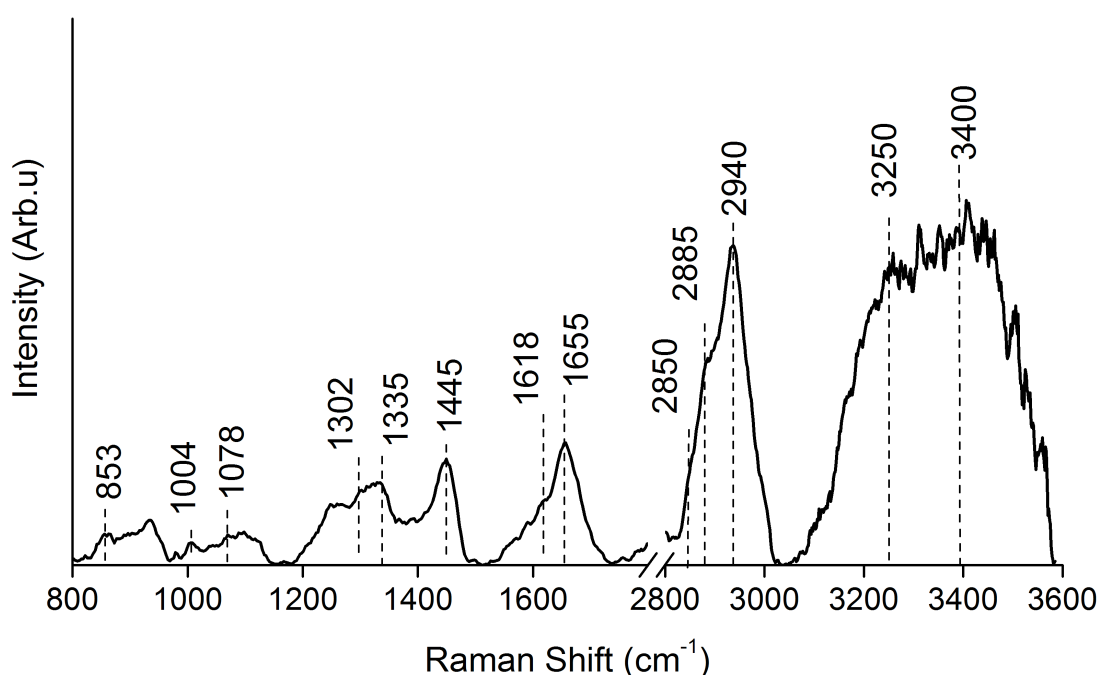

**Supplementary Fig. S2** | The mean *in vivo* FP/HW Raman spectra  $\pm 1$  standard deviation (SD) of the testing dataset (20% of the total dataset) (normal (n=124); ESCC (n=110)) for independent validation.

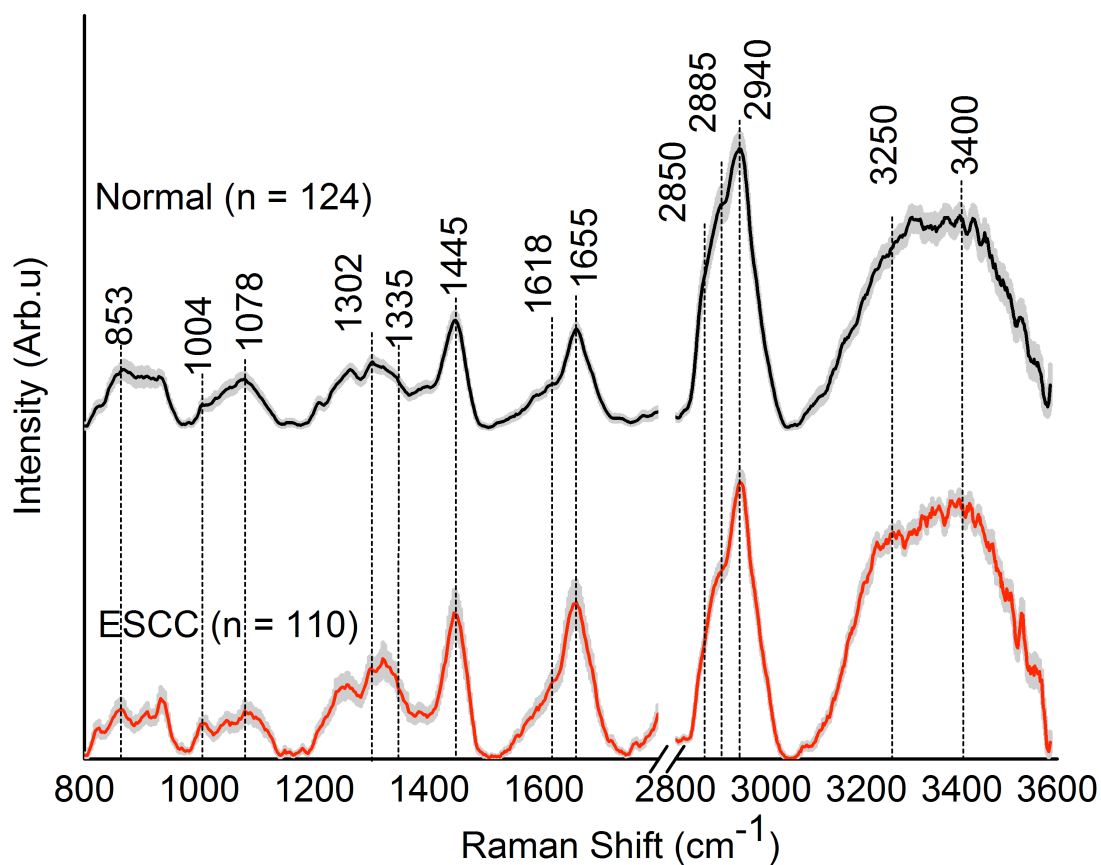

**Supplementary Fig. S3** | The predictive probabilities of *in vivo* Raman spectra belonging to (i) normal esophagus (n=124), and (ii) ESCC (n=110) of the testing dataset (20% of the total dataset), using the diagnostic models developed with the FP, HW and the integrated FP/HW Raman techniques, respectively. (○) normal; (▲) ESCC.

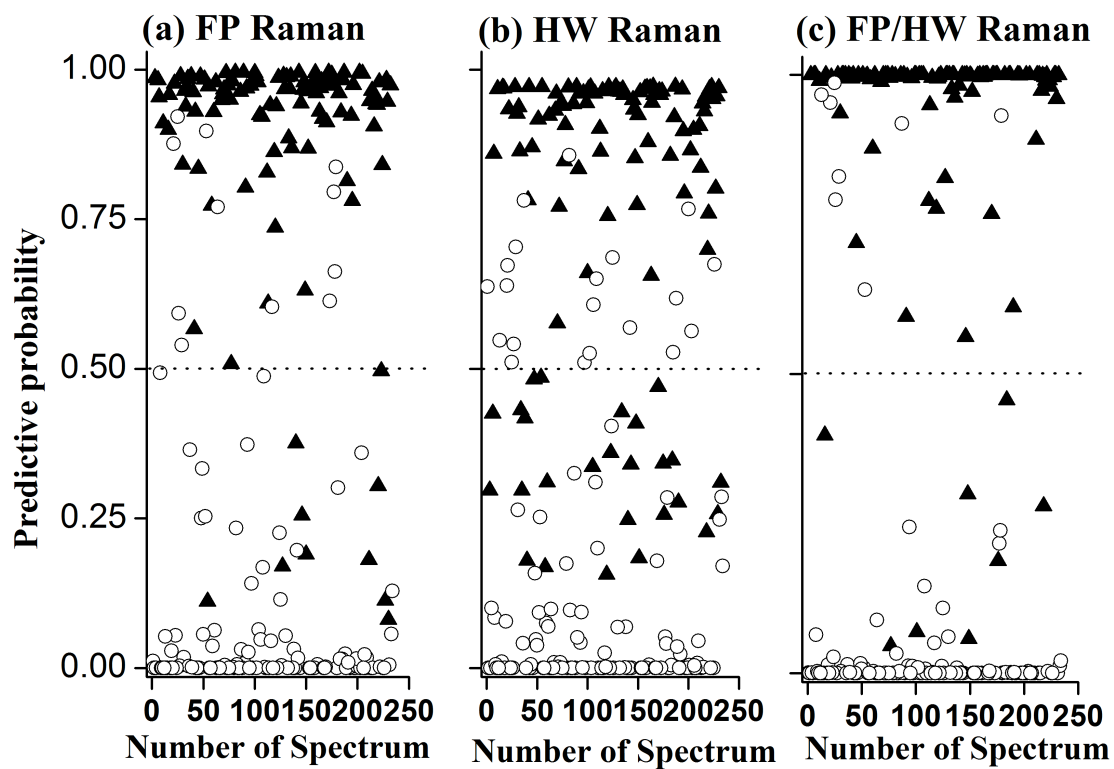

Supplement: srep12957-s1.pdf [file srep12957-s1.pdf]
